# Supplementary material for: Analgesic Interaction Between Morphine with Fentanyl In Experimental Murine Pain
Source: Research Square preprint supplement (doi:10.21203/rs.3.rs-304152/v1), 2021-03-11
Supplement: Supplementary file 1 [file 1f101cf03bf30a67419d053f.docx]

**ORIGINAL DATA**

**TABLE 1**

**ED50**

**FHP-I Dose/ Effect**

Morphine 0,01/39-- 0,03/60--0,1/75--0,3/96

Fentanyl 0,01/20--0,03/39--0,06/51--.0,12/68--0,2/80

*FHP-II*

Morphine 0,03/25--0,1/40--0,3/54--1/78

Fentanyl 0,01/27--0,03/52--0,1/69--0,3/88

**TF**

Morphine 1/19--3/35--5/49--10/67--30/87

Fentanyl 0,001/2--0,003/6--0,01/21--0,03/33--1/60

**TABLE 2**

**ED50 of isobolograms constructed with the following fractions ED50 (1/2; 1/4; 1/8; 1/16) of the individual ED50 of each opioid**

DOSIS EFECTO INTERACTION

FHP-I 0.1125-0.056-0.028-0.014 0.025 0.223

FHP-II 0,10-0,05-0,025-0,0125 0.035 0. 169

TF 2.54-1.27-0.63-031 1.03 0.406

**FIGURES**

**FIG 1 y 2**

The figures were constructed with the data from tables 1 and 2, in a cartesian axis system, using the ordinate for the effect and the abscissa for the logarithm of the dose.
